# Supplementary material for: Type I Interferon Induced by Streptococcus suis Serotype 2 is Strain-Dependent and May Be Beneficial for Host Survival
Source: PubMed Central journal article supplement (PMC5581389; doi:10.3389/fimmu.2017.01039), 2017-08-28
Supplement: data_sheet_1.pdf [file data_sheet_1.pdf]

## *Supplementary Material*

### **Type I Interferon Induced by *Streptococcus suis* Serotype 2 is Strain-Dependent and May Be Beneficial for Host Survival**

**Jean-Philippe Auger, Agustina Santinon, David Roy, Karen Mossman, Jianguo Xu, Mariela Segura, and Marcelo Gottschalk\***

\* **Correspondence:** Marcelo Gottschalk; [marcelo.gottschalk@umontreal.ca](mailto:marcelo.gottschalk@umontreal.ca)

#### **Supplementary Table**

**Table S1.** Primer sequences used for real-time qPCR

#### **Supplementary Figures**

**Figure S1.** Intermediate virulent *Streptococcus suis* ST25 strains induce high levels of IFN- $\beta$  expression by dendritic cells

**Figure S2.** Ligands of the different Toll-like receptors evaluated in this study, with the exception of TLR2, induce IFN- $\beta$  by dendritic cells

**Figure S3.** IL-6 and CXCL1 induced by *Streptococcus suis* and bacterial TLR2 ligands partially require TLR2 expression by dendritic cells

**Figure S4.** The intermediate virulent *Streptococcus suis* strain 89-1591 is highly encapsulated

**Figure S5.** *Streptococcus suis*-induced IL-6 and CXCL1 expression by dendritic cells is partially internalization-dependent

**Table S1. Primer sequences used for real-time qPCR.**

| <b>Gene</b>  | <b>Forward (F) and reverse (R) primers</b>                       |
|--------------|------------------------------------------------------------------|
| <i>Atp5b</i> | F: ACC AGC CCA CCC TAG CCA CC<br>R: TGC AGG GGC AGG GTC AGT CA   |
| <i>Gapdh</i> | F: CCC GTA GAC AAA ATG GTG AAG<br>R: GAC TGT GCC GTT GAA TTT G   |
| <i>Ifnb</i>  | F: CCC AGT GCT GGA GCC ATT GT<br>R: CCC TAT GGA GAT GAC GGA GA   |
| <i>Irf1</i>  | F: AGG CAT CCT TGT TGA TGT CC<br>R: AAT TCC AAC CAA ATC CCA GG   |
| <i>Irf3</i>  | F:GAT GGC TGA CTT TGG CAT CT<br>R: ACC GGA AAT TCC TCT TCC AG    |
| <i>Irf7</i>  | F: AGC ATT GCT GAG GCT CAC TT<br>R: TGA TCC GCA TAA GGT GTA CG   |
| <i>Il6</i>   | F: ATG GTA GCT ACC AAA CTG GAT<br>R: TGA AGG ACT CTG GCT TTG TCT |
| <i>Cxcl1</i> | F: TCT CCG TTA CTT GGG GAC AC<br>R: CCA CAC TCA AGA ATG GTC GC   |

Auger *et al.*

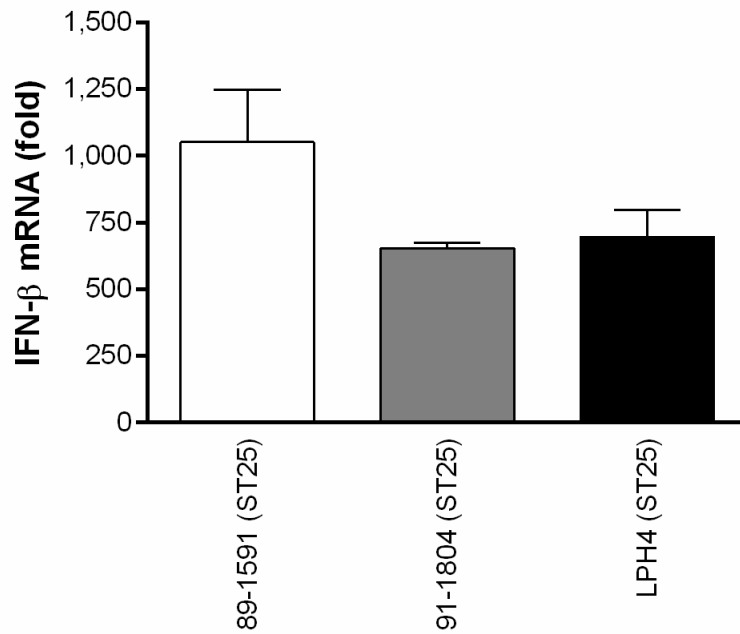

**Figure S1. Intermediate virulent *Streptococcus suis* ST25 strains induce high levels of IFN- $\beta$  expression by dendritic cells.** IFN- $\beta$  mRNA expression by dendritic cells 6 h following infection with the intermediate virulent ST25 strains 89-1591, 91-1804, and LPH4. Virulence of strains 91-1804 and LPH4 was previously described. Data represent the mean  $\pm$  SEM (n = 4).

Auger *et al.*

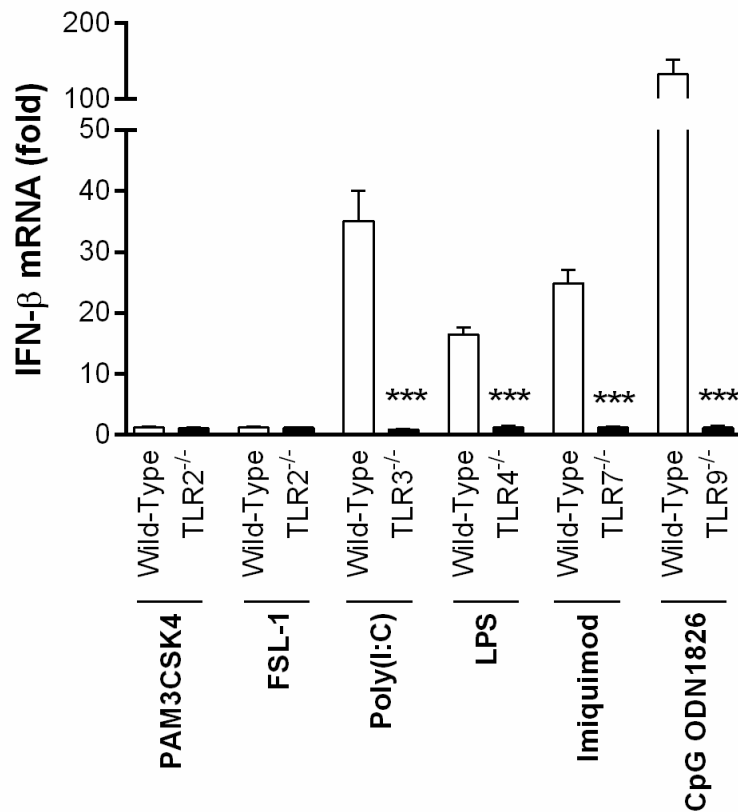

**Figure S2. Ligands of the different Toll-like receptors (TLRs) evaluated in this study, with the exception of TLR2, induce IFN-β by dendritic cells.** IFN-β mRNA expression by wild-type and deficient dendritic cells 6 h following activation with the different TLR ligands: 1 μg/mL PAM3CSK4 (TLR1/2), 1 μg/mL FSL-1 (TLR2/6), 10 μg/mL poly(I:C) (TLR3), 100 ng/mL lipopolysaccharide (LPS) (TLR4), 5 μg/mL imiquimod (TLR7), and 1 μM CpG ODN1826 (TLR9). Data represent the mean ± SEM (n = 4). \*\*\* ( $p < 0.001$ ) indicates a significant difference in IFN-β expression by wild-type and deficient dendritic cells.

Auger *et al.*

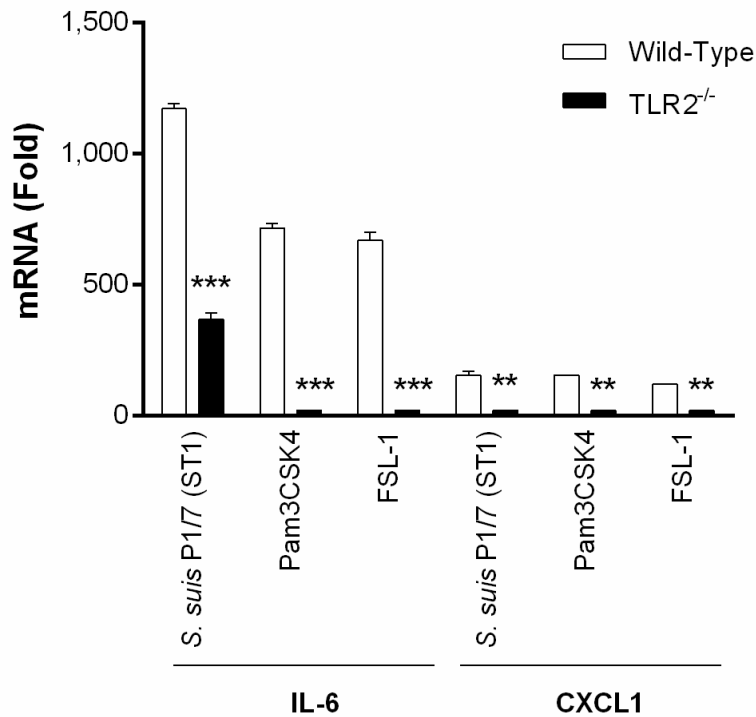

**Figure S3. IL-6 and CXCL1 induced by *Streptococcus suis* and bacterial TLR2 ligands partially require TLR2 expression by dendritic cells.** IL-6 and CXCL1 expression by wild-type or TLR2<sup>-/-</sup> dendritic cells 6 h following infection with *S. suis* ST1 strain P1/7 or activation with the TLR2 ligands PAM3CSK4 (1 µg/mL) and FSL-1 (1 µg/mL). Data represent the mean ± SEM (n = 3). \*\* ( $p < 0.01$ ) and \*\*\* ( $p < 0.001$ ) indicate a significant difference between expression by wild-type and TLR2<sup>-/-</sup> dendritic cells.

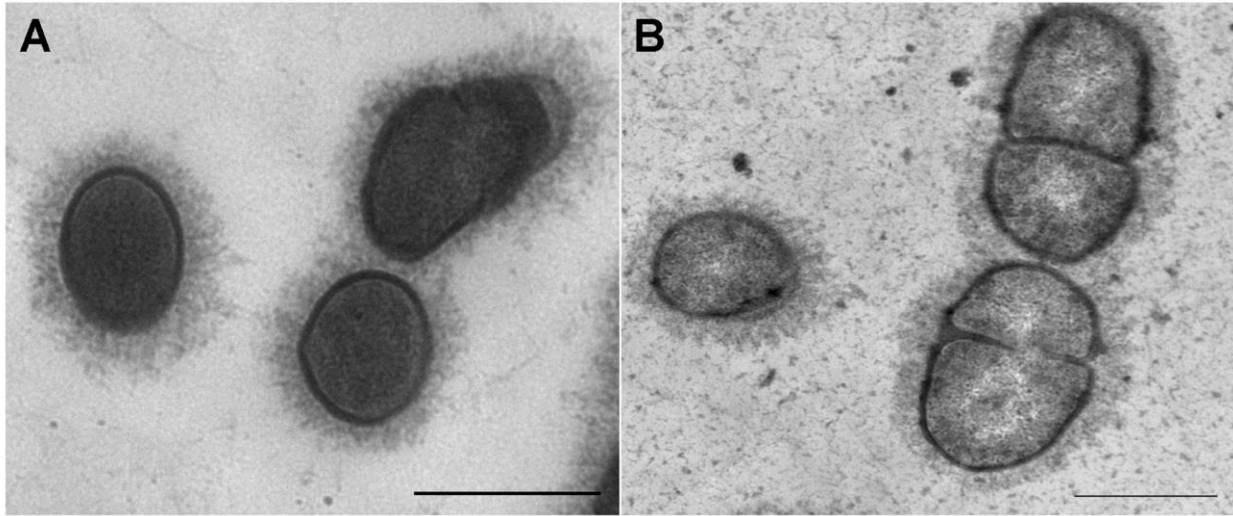

**Figure S4. The intermediate virulent *Streptococcus suis* strain 89-1591 is highly encapsulated.** Transmission electron micrographs following antibody stabilization of the capsular polysaccharide, using an anti-*S. suis* serotype 2 rabbit serum of ST1 strain P1/7 (A) and ST25 strain 89-1591 (B). Black bars = 1  $\mu$ m.

Auger *et al.*

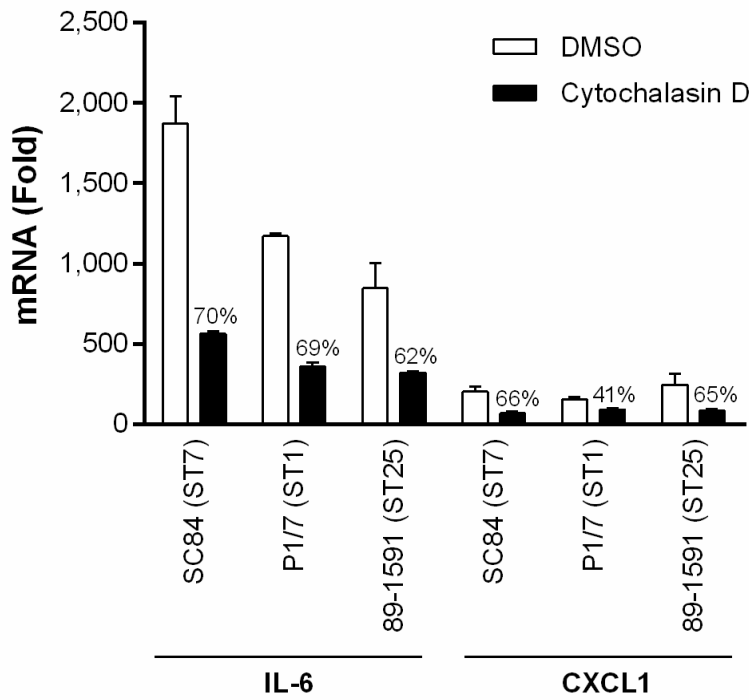

**Figure S5. *Streptococcus suis*-induced IL-6 and CXCL1 expression by dendritic cells is partially internalization-dependent.** IL-6 and CXCL1 expression by dendritic cells pretreated with cytochalasin D (5  $\mu$ M) to inhibit actin polymerization 6 h following infection with *S. suis*. Mock-treated cells (DMSO) were used as controls. Data represent the mean  $\pm$  SEM (n = 3). The percentages of cytochalasin D-mediated inhibition of cytokine expression are indicated.

Auger *et al.*
